# Supplementary material for: Differences in Spatiotemporal Variability of Potential and Reference Crop Evapotranspirations
Source: MDPI journal article supplement (doi:10.3390/w14060988), 2022-03-21
Supplement: s1 [file s1]

Archive with 1 entries (1 files):
- Supplementary Materials.pdf
