# Supplementary material for: Differences in Spatiotemporal Variability of Potential and Reference Crop Evapotranspirations
Source: MDPI journal article supplement (doi:10.3390/w14060988), 2022-03-21
Supplement: s1 [file s1 › Supplementary Materials.pdf]

# Supplementary materials

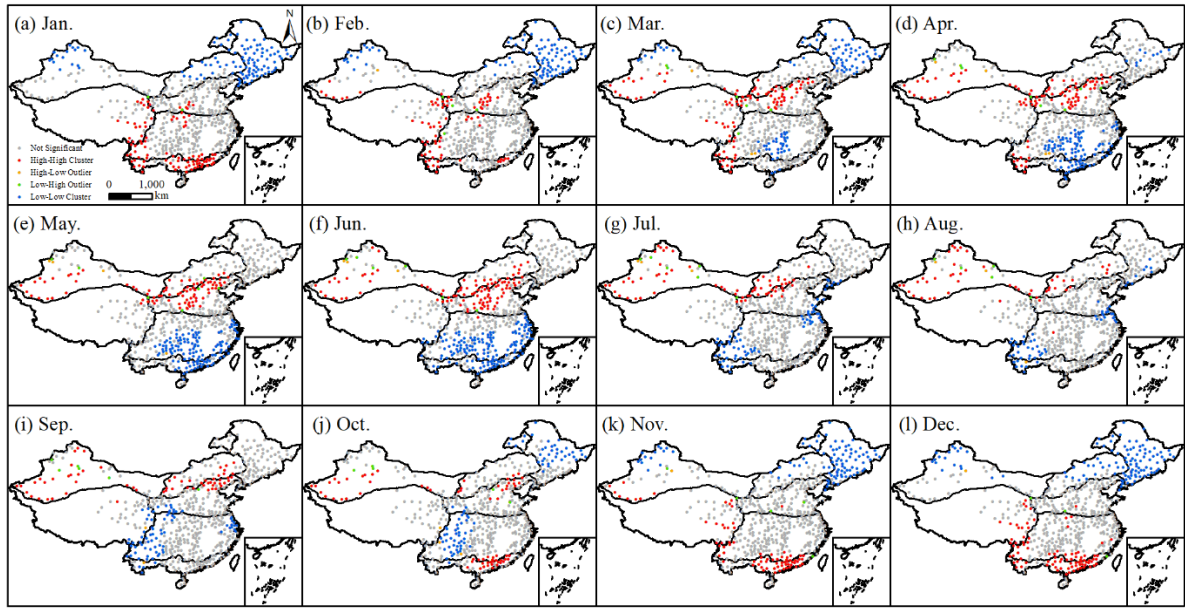

Figure S1. The Anselin Local Moran's I index distribution of monthly D.

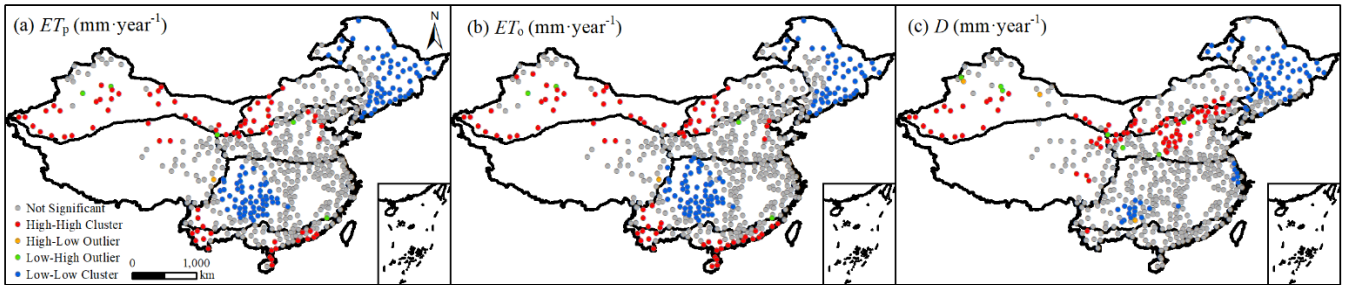

Figure S2 The Anselin Local Moran's I index distribution of yearly  $ET_p$  (a),  $ET_0$  (b) and  $D$  (c) respectively.
